# Supplementary material for: Liquid Phase Synthesis of CoP Nanoparticles with High Electrical Conductivity for Advanced Energy Storage
Source: Hindawi journal article supplement (doi:10.1155/2017/9728591), 2017-01-01
Supplement: f1 [file 9728591.f1.doc]

**Supporting information**

**Liquid phase synthesis of CoP nanoparticles with high conductivity for advanced energy storage**

Guo-Qun Zhang *a,b*, Bo Li *a,b*, Mao-Cheng Liu *a,b**, Shang-Ke Yuan *c*, Leng-Yuan Niu *a*

*a* *State Key Laboratory of Advanced Processing and Recycling of Non-ferrous Metals, Lanzhou University of Technology, Lanzhou 730050, PR China*

*b School of Materials Science and Engineering, Lanzhou University of Technology, Lanzhou 730050, PR China*

*c College of civil engineering, Lan zhou Institute of Technology, Lan zhou 730050, PR China*

* Corresponding author: Tel. +86-(0)931-2976579, Fax +86-(0)931-2976578,

E-mail: liumc@lut.cn

**Structure characterization**

The crystallite structure wascharacterized by X-ray diffraction (XRD, Rigaku D/MAX 2400 diffractometer, Japan) with Cu K*α* radiation (*λ* = 1.5418 Å) operating at 40 kV and 60 mA. The morphology and microstructure of the materials werecharacterized by field emission scanning electron microscope (SEM, JEOL, JSM-6701F, Japan) and transmission electron microscope (TEM, JEOL, JEM-2010, Japan). The elemental surface composition of CoP was analyzed by X-ray photoelectron spectroscopy (XPS, PHI 5700, ESCA). The specific surface area was calculated according to the Brunauer-Emmett-Teller (BET) method.


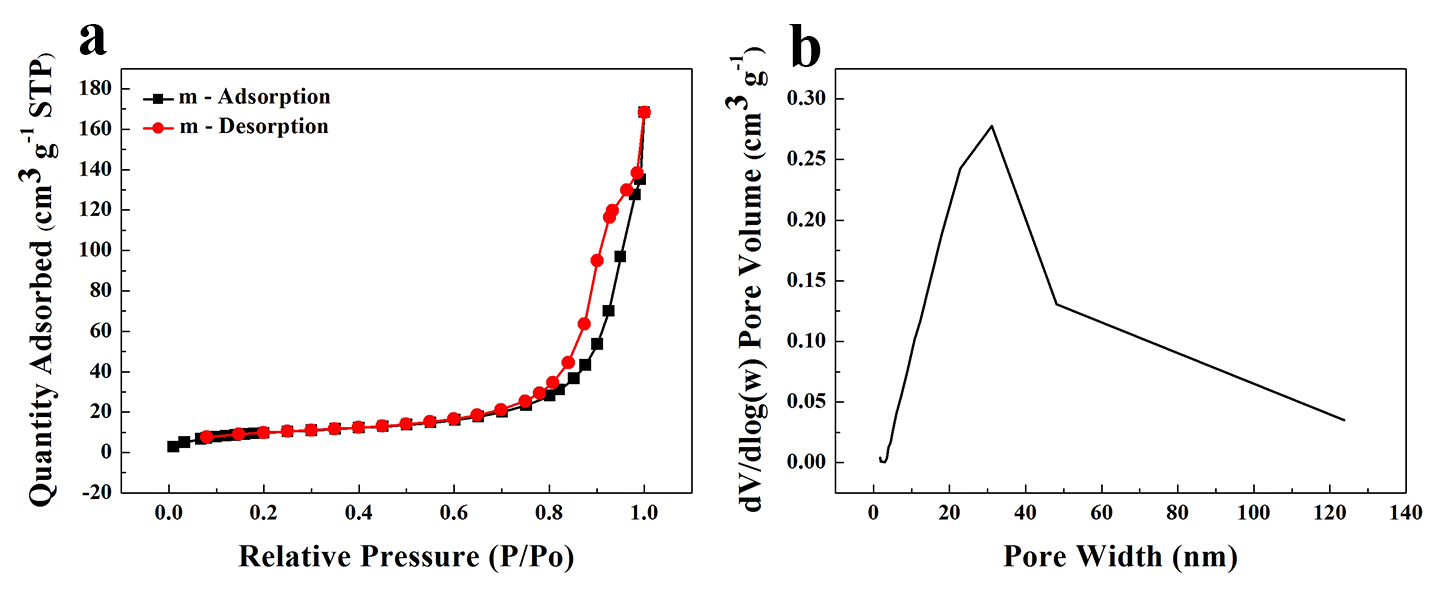


Fig. S1. (a) The nitrogen adsorption-desorption isotherms of CoP and (b) pore size distribution of CoP.

**Electrode preparation and electrochemical measurements**

The working electrodes were prepared as following. 80 wt.% of CoPwas mixed with 7.5 wt.% of acetylene black and 7.5 wt.% of conducting graphite in an agate mortar until a homogeneous black powder was obtained. To this mixture, 5 wt.% of poly(tetraﬂuoroethylene) was added with a few drops of ethanol. Resulting paste was pressed at 10 MPa to nickel foam and dried at 80 °C for 12 h. Each carbon electrode contained about 4 mg of CoP and had a geometric surface area of about 1 cm2.

A typical three-electrode experimental cell equipped with a working electrode, a platinum foil counter electrode, and a saturated calomel reference electrode (SCE) was used for electrochemical measurements of the as-prepared working electrodes. All electrochemical measurements were performed on an electrochemical working station (CHI660D, Shanghai, China) in 2 M KOH aqueous solution at 25 °C.

**Preparation of the asymmetric supercapacitor**

The asymmetric supercapacitor consisted of two electrically isolated electrodes: CoP as the positive electrode and AC as the negative electrode, 80 wt.% of active material was mixed with 7.5 wt.% of acetylene black and 7.5 wt.% of conducting graphite in an agate mortar until a homogeneous black powder was obtained. To this mixture, 5 wt.% of polytetrafluoroethylene (PTFE) was added together with a few drops of ethanol. The resulting paste was pressed at 10 MPa into nickel foam, and then dried at 80 °C for 12 h, joined together by a porous non-woven cloth separator soaked in 2 mol L-1 aqueous KOH solution. Each electrode has a geometric surface area of 1 cm2. For the supercapacitor, the charge balance follows the relationship:

(1)

where *Q*+ and *Q*- represent the charge stored in positive electrode and negative electrode, respectively. The *Q* of each electrode depends on the *C*m, the potential range of the charge/discharge tests (), and the mass of the electrode (*m*) according to the following equation:

(2)

When *Q*+ = *Q*-, the ratio of the masses of the positive electrode (*m*+) and negative electrode (*m*-) will follow the equation:

(3)

The *C*m of the AC and CoP are 206.6 F g-1 and 208.2 F g-1 at. On the basis of the *C*m values and the potential windows found for the AC and Ni-C electrodes, the optimal mass ratio should be *m*+/*m*-=1.33 in the asymmetric supercapacitor.


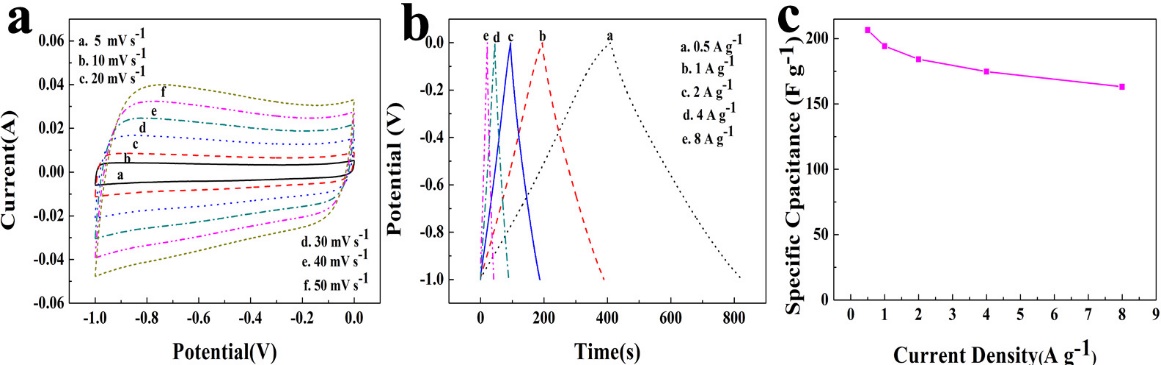


Figure S2. (a) Cyclic voltammograms curves, (b) Galvanostatic discharge/charge curves, and (c) Specific capacitance of AC.


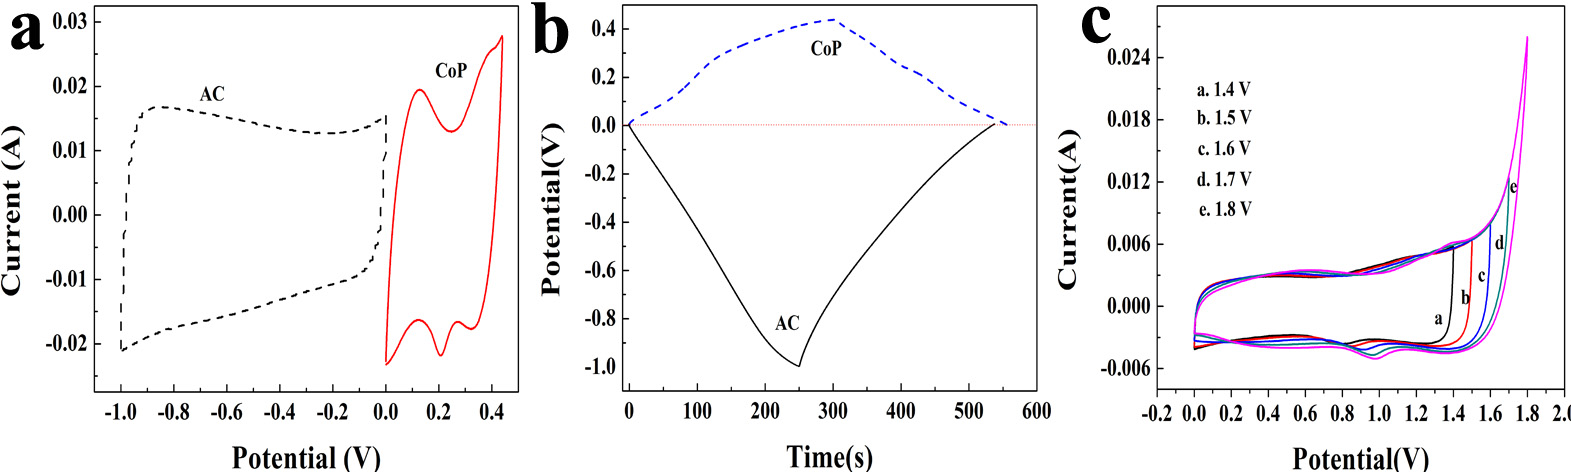


Figure S3. (a) CV curves of AC and CoP nanoparticles at a scan rate of 20 mV s-1, (b) Galvanostatic charge/discharge curves of AC and CoP, (c) Cyclic voltammogram curves of the AC//CoP asymmetric supercapacitor with different operation voltage windows at a scan rate of 10 mV s-1.
